# Supplementary material for: A novel synthesis approach to transition metal boracitesElectronic supplementary information (ESI) available: selected bond distances and angles for Co3B7O13Cl and Cu3B7O13Cl, refined atomic coordinates for Cu3B7O13Cl. See http://www.rsc.org/suppdata/jm/b1/b109461k/
Source: Royal Society of Chemistry journal article supplement (doi:10.1039/b109461k), 2002-04-15
Supplement: b109461k.doc [file b109461k.doc]

**Supplementary materials**

Table 1 Selected bond distances (Å) and bond angles (o) of Co3B7O13Cl.

| Co1_Cl1 | 2.566(3) | Cl1_Co1_O2 | 108.0(3) |
| --- | --- | --- | --- |
| Co1_O2 | 2.039(8) | Cl1_Co1_O3 | 92.0(3) |
| Co1_O3 | 2.074(13) | Cl1_Co1_O4 | 101.4(3) |
| Co1_O4 | 2.004(8) | Cl1_Co1_O5 | 90.1(3) |
| Co1_O5 | 2.083(9) | O2_Co1_O3 | 88.3(4) |
|  |  | O2_Co1_O4 | 150.5(3) |
|  |  | O2_Co1_O5 | 87.6(4) |
|  |  | O3_Co1_O4 | 88.9(5) |
|  |  | O3_Co1_O5 | 175.8(4) |
|  |  | O4_Co1_O5 | 94.3(3) |
|  |  |  |  |
| B1_O2 | 1.505(13) | O2_B1_O3 | 110.6(12) |
| B1_O3 | 1.469(22) | O2_B1_O4 | 103.1(16) |
| B1_O4 | 1.462(17) | O2_B1_O5 | 110.6(8) |
| B1_O5 | 1.455(21) | O3_B1_O4 | 111.4(9) |
|  |  | O3_B1_O5 | 110.7(17) |
|  |  | O4_B1_O5 | 110.2(14) |
|  |  |  |  |
| B2_O1 | 1.471(10) | O1_B2_O3 | 115.8(17) |
| B2_O3 | 1.392(24) | O1_B2_O4 | 106.6(11) |
| B2_O4 | 1.586(18) | O1_B2_O5 | 113.6(12) |
| B2_O5 | 1.447(20) | O3_B2_O4 | 106.2(11) |
|  |  | O3_B2_O5 | 110.3(10) |
|  |  | O4_B2_O5 | 103.1(15) |
|  |  |  |  |
| B3_O2 | 1.436(7) | O2_B3_O2 | 119.90(10) (3×) |

Table2 Refined atomic coordinates of Cu3B7O13Cl.

| Name | Wyckoff position | x | y | z | Ui/Ue*100 |
| --- | --- | --- | --- | --- | --- |
| Cu1 | 4a | 0.7529(16) | 0.2498(13) | 0.2370(10) | 1.18(4) |
| Cu2 | 4a | 0.4964(9) | 0.5104(8) | 0.4998(17) | 1.18(4) |
| Cu3 | 4a | 0.9856(8) | 0.0218(8) | 0.4993(19) | 1.18(4) |
| Cl1 | 4a | 0.7603(17) | 0.2592(24) | 0.5017(17) | 1.99(25) |
| B1 | 4a | 0.500(16) | 0.496(17) | 0.245(13) | 1.08(30) |
| B2 | 4a | 0.248(8) | 0.247(15) | 0.501(7) | 1.08(30) |
| B3 | 4a | 0.007(14) | 1.002(16) | 0.242(13) | 1.08(30) |
| B4 | 4a | 0.450(5) | 0.229(8) | 0.345(5) | 1.08(30) |
| B5 | 4a | 0.248(11) | 0.415(11) | 0.172(8) | 1.08(30) |
| B6 | 4a | 0.902(7) | 0.750(14) | 0.823(6) | 1.08(30) |
| B7 | 4a | 0.756(11) | 0.894(11) | 0.667(8) | 1.08(30) |
| O1 | 4a | 0.244(5) | 0.255(7) | 0.2411(35) | 0.14(8) |
| O2 | 4a | 0.529(5) | 0.325(4) | 0.2694(27) | 0.14(8) |
| O3 | 4a | 0.364(5) | 0.340(4) | 0.4345(37) | 0.14(8) |
| O4 | 4a | 0.966(5) | 0.163(4) | 0.2685(30) | 0.14(8) |
| O5 | 4a | 0.348(5) | 0.349(4) | 0.0682(45) | 0.14(8) |
| O6 | 4a | 0.170(7) | 0.967(5) | 0.2312(30) | 0.14(8) |
| O7 | 4a | 0.154(5) | 0.158(4) | 0.4267(41) | 0.14(8) |
| O8 | 4a | 0.332(6) | 0.526(5) | 0.2356(31) | 0.14(8) |
| O9 | 4a | 0.168(4) | 0.133(4) | 0.0632(45) | 0.14(8) |
| O10 | 4a | 0.941(5) | 0.586(4) | 0.8430(39) | 0.14(8) |
| O11 | 4a | 0.539(4) | 0.908(4) | 0.8513(38) | 0.14(8) |
| O12 | 4a | 0.909(5) | 0.546(4) | 0.6446(40) | 0.14(8) |
| O13 | 4a | 0.590(5) | 0.952(4) | 0.6474(39) | 0.14(8) |
|  |  |  |  |  |  |

Table 3 Selected bond distances (Å) and bond angles (o) of Cu3B7O13Cl.

| Cu1_Cl1 | 2.82(2) |  |  |
| --- | --- | --- | --- |
| Cu1_O2 | 2.04(4) |  |  |
| Cu1_O4 | 1.98(5) |  |  |
| Cu1_O6 | 1.96(5) |  |  |
| Cu1_O8 | 2.01(5) |  |  |
|  |  |  |  |
| Cu2_Cl1 | 2.79(2) |  |  |
| Cu2_O3 | 1.99(4) |  |  |
| Cu2_O5 | 1.96(4) |  |  |
| Cu2_O10 | 2.05(4) |  |  |
| Cu2_O12 | 1.95(5) |  |  |
|  |  |  |  |
| Cu3_Cl1 | 2.77(2) |  |  |
| Cu3_O7 | 2.03(4) |  |  |
| Cu3_O9 | 2.00(4) |  |  |
| Cu3_O11 | 2.03(4) |  |  |
| Cu3_O13 | 1.99(5) |  |  |
|  |  |  |  |
| B1_O2 | 1.49(14) | O2_B1_O8 | 110.(10) |
| B1_O8 | 1.45(13) | O2_B1_O10 | 107.(10) |
| B1_O10 | 1.49(14) | O2_B1_O12 | 110.(9) |
| B1_O12 | 1.48(16) | O8_B1_O10 | 107.(9) |
|  |  | O8_B1_O12 | 114.(10) |
|  |  | O10_B1_O12 | 109.(10) |
|  |  |  |  |
| B2_O3 | 1.49(9) | O3_B2_O5 | 111.(9) |
| B2_O5 | 1.43(11) | O3_B2_O7 | 108.(6) |
| B2_O7 | 1.41(10) | O3_B2_O9 | 108.(4) |
| B2_O9 | 1.41(10) | O5_B2_O7 | 111.(5) |
|  |  | O5_B2_O9 | 114.(7) |
|  |  | O7_B2_O9 | 105.(9) |
|  |  |  |  |
| B3_O4 | 1.44(13) | O4_B3_O6 | 117.(10) |
| B3_O6 | 1.42(12) | O4_B3_O11 | 104.(9) |
| B3_O11 | 1.58(15) | O4_B3_O13 | 108.(9) |
| B3_O13 | 1.46(15) | O6_B3_O11 | 102.(9) |
|  |  | O6_B3_O13 | 115.(10) |
|  |  | O11_B3_O13 | 111.(9) |
|  |  |  |  |

Table 3 (Continued)

| B4_O2 | 1.39(7) | O2_B4_O3 | 108.(5) |
| --- | --- | --- | --- |
| B4_O3 | 1.60(6) | O2_B4_O11 | 126.(6) |
| B4_O11 | 1.16(7) | O3_B4_O11 | 125.(6) |
|  |  |  |  |
| B5_O1 | 1.58(11) | O1_B5_O5 | 97.(6) |
| B5_O5 | 1.61(10) | O1_B5_O8 | 107.(7) |
| B5_O8 | 1.40(10) | O1_B5_O12 | 108.(7) |
| B5_O12 | 1.40(9) | O5_B5_O8 | 112.(7) |
|  |  | O5_B5_O12 | 113.(7) |
|  |  | O8_B5_O12 | 117.(7) |
|  |  |  |  |
| B6_O1 | 1.58(6) | O1_B6_O4 | 109.(6) |
| B6_O4 | 1.49(9) | O1_B6_O7 | 106.(5) |
| B6_O7 | 1.54(9) | O1_B6_O10 | 105.(7) |
| B6_O10 | 1.44(11) | O4_B6_O7 | 110.(7) |
|  |  | O4_B6_O10 | 112.(6) |
|  |  | O7_B6_O10 | 115.(6) |
|  |  |  |  |
| B7_O1 | 1.54(10) | O1_B7_O6 | 110.(7) |
| B7_O6 | 1.53(10) | O1_B7_O9 | 112.(6) |
| B7_O9 | 1.42(10) | O1_B7_O13 | 111.(6) |
| B7_O13 | 1.51(10) | O6_B7_O9 | 112.(6) |
|  |  | O6_B7_O13 | 102.(6) |
|  |  | O9_B7_O13 | 110.(7) |
